# Supplementary material
Source: publisher site journal article supplement (https://www.dovepress.com/article/147204)
Supplement: Supplementary file 1 [file get_supplementary_file.php]

## Association of *GEMIN4* gene polymorphism and the risk of cancer: a meta-analysis

Table.S1 Details of excluded article

| First author          | Title                                                                                                                                                                                                         | Journal name                                        | Year | Volume | Issue | Page      | Data base  | Excluded reason                     |
|-----------------------|---------------------------------------------------------------------------------------------------------------------------------------------------------------------------------------------------------------|-----------------------------------------------------|------|--------|-------|-----------|------------|-------------------------------------|
| Bruzgielewicz, Antoni | EVALUATION OF POLYMORPHISMS IN MICRORNA BIOSYNTHESIS GENES AND RISK OF LARYNGEAL CANCER IN THE POLISH POPULATION                                                                                              | POLISH JOURNAL OF PATHOLOGY                         | 2016 | 67     | 3     | 283-290   | Web of SCI | not <i>GEMIN4</i> gene polymorphism |
| Yilmaz, Senay Gorucu  | SNP Variation in MicroRNA Biogenesis Pathway Genes as a New Innovation Strategy for Alzheimer Disease Diagnostics: A Study of 10 Candidate Genes in an Understudied Population From the Eastern Mediterranean | ALZHEIMER DISEASE & ASSOCIATED DISORDERS            | 2016 | 30     | 3     | 203-209   | Web of SCI | Other disease study                 |
| Li, Rong              | MiRNA-Related Genetic Variations Associated with Radiotherapy-Induced Toxicities in Patients with Locally Advanced Non-Small Cell Lung Cancer                                                                 | PLOS ONE                                            | 2016 | 11     | 3     | e0150467  | Web of SCI | Other disease study                 |
| zhu, Wenbo            | Genetic variants in the MicroRNA biosynthetic pathway Gemin3 and Gemin4 are associated with a risk of cancer: a meta-analysis                                                                                 | PEERJ                                               | 2016 | 4      |       | e1724     | Web of SCI | Review                              |
| Wan, Yang             | Transcriptome analysis reveals a ribosome constituents disorder involved in the RPL5 downregulated zebrafish model of Diamond-Blackfan anemia                                                                 | BMC MEDICAL GENOMICS                                | 2016 | 9      |       | 13        | Web of SCI | not case-control study              |
| Colicino, Elena       | Long-term exposure to black carbon, cognition and single nucleotide polymorphisms in microRNA processing genes in older men                                                                                   | ENVIRONMENT INTERNATIONAL                           | 2016 | 88     |       | 86-93     | Web of SCI | Other disease study                 |
| Melnik, Bodo C        | Milk: an epigenetic amplifier of FTO-mediated transcription? Implications for Western diseases                                                                                                                | JOURNAL OF TRANSLATIONAL MEDICINE                   | 2015 | 13     |       | 385       | Web of SCI | Review                              |
| Sung, Hyuna           | Common genetic variants in epigenetic machinery genes and risk of upper gastrointestinal cancers                                                                                                              | INTERNATIONAL JOURNAL OF EPIDEMIOLOGY               | 2015 | 44     | 4     | 1341-1352 | Web of SCI | not <i>GEMIN4</i> gene polymorphism |
| Wu, Shuangshuang      | Genetic variations in DROSHA and DICER and survival of advanced non-small cell lung cancer: a two-stage study in Chinese population                                                                           | GENES & GENOMICS                                    | 2015 | 37     | 7     | 571-578   | Web of SCI | not <i>GEMIN4</i> gene polymorphism |
| Gao, Yuhuan           | Single nucleotide polymorphisms of microRNA processing genes and outcome of non-Hodgkin's lymphoma                                                                                                            | ONCOTARGETS AND THERAPY                             | 2015 | 8      |       | 1735-1741 | Web of SCI | lack of healthy control             |
| Shang, Mengqiao       | Association between SNPs in miRNA-machinery genes and chronic hepatitis B in the Chinese Han population                                                                                                       | INFECTION GENETICS AND EVOLUTION                    | 2014 | 28     |       | 113-117   | Web of SCI | Other disease study                 |
| Yang, Pei-Wen         | Association of miRNA-related Genetic Polymorphisms and Prognosis in Patients with Esophageal Squamous Cell Carcinoma                                                                                          | ANNALS OF SURGICAL ONCOLOGY                         | 2014 | 21     | 4     | S601-S609 | Web of SCI | lack of healthy control             |
| De Ruyck, Kim         | A let-7 microRNA polymorphism in the KRAS 3'-UTR is prognostic in oropharyngeal cancer                                                                                                                        | CANCER EPIDEMIOLOGY                                 | 2014 | 38     | 5     | 591-598   | Web of SCI | not case-control study              |
| Hogg, Daniel R        | Human genetic variation and its effect on miRNA biogenesis, activity and function                                                                                                                             | BIOCHEMICAL SOCIETY TRANSACTIONS                    | 2014 | 42     | 4     | 1184-1189 | Web of SCI | Review                              |
| Melo, Sonia A.        | Disruption of microRNA nuclear transport in human cancer                                                                                                                                                      | SEMINARS IN CANCER BIOLOGY                          | 2014 | 27     |       | 46-51     | Web of SCI | Review                              |
| Cao, Ji-Xiang         | E2F1-regulated DROSHA promotes miR-630 biosynthesis in cisplatin-exposed cancer cells                                                                                                                         | BIOCHEMICAL AND BIOPHYSICAL RESEARCH COMMUNICATIONS | 2014 | 450    | 1     | 470-475   | Web of SCI | not case-control study              |
| Sperber, Henrik       | MiRNA sensitivity to Drosha levels correlates with pre-miRNA secondary structure                                                                                                                              | RNA-A PUBLICATION OF THE RNA SOCIETY                | 2014 | 20     | 5     | 621-631   | Web of SCI | not case-control study              |
| Liu, Shuang           | Single Nucleotide Polymorphisms of MicroRNA Processing Machinery Genes and Outcome of Hepatocellular Carcinoma                                                                                                | PLOS ONE                                            | 2014 | 9      | 3     | e92791    | Web of SCI | lack of healthy control             |
| Weng, Yuxiong         | Common genetic variants in the microRNA biogenesis pathway are associated with malignant peripheral nerve sheath tumor risk in a Chinese population                                                           | CANCER EPIDEMIOLOGY                                 | 2013 | 37     | 6     | 913-916   | Web of SCI | Retracted article                   |
| Zhou, Yi              | Evaluation of Six SNPs of MicroRNA Machinery Genes and Risk of Schizophrenia                                                                                                                                  | JOURNAL OF MOLECULAR NEUROSCIENCE                   | 2013 | 49     | 3     | 594-599   | Web of SCI | Other disease study                 |
| Fan, Yanbo            | Kruppel-Like Factor-11, a Transcription Factor Involved in Diabetes Mellitus, Suppresses Endothelial Cell Activation via the Nuclear Factor-kappa B Signaling Pathway                                         | ARTERIOSCLEROSIS THROMBOSIS AND VASCULAR BIOLOGY    | 2012 | 32     | 12    | 2981      | Web of SCI | not case-control study              |

|                       |                                                                                                                                                     |                                                                         |      |     |    |           |            |                                |
|-----------------------|-----------------------------------------------------------------------------------------------------------------------------------------------------|-------------------------------------------------------------------------|------|-----|----|-----------|------------|--------------------------------|
| He, Yong              | Genetic Variations in MicroRNA Processing Genes Are Associated with Susceptibility in Depression                                                    | DNA AND CELL BIOLOGY                                                    | 2012 | 31  | 9  | 1499-1506 | Web of SCI | Other disease study            |
| Sung, Hyuna           | Common genetic polymorphisms of microRNA biogenesis pathway genes and breast cancer survival                                                        | BMC CANCER                                                              | 2012 | 12  |    | 195       | Web of SCI | lack of healthy control        |
| Kim, Hwa-Ryeon        | A p53-inducible microRNA-34a downregulates Ras signaling by targeting IMPDH                                                                         | BIOCHEMICAL AND BIOPHYSICAL RESEARCH COMMUNICATIONS                     | 2012 | 418 | 4  | 682-688   | Web of SCI | not case-control study         |
| Permeth-Wey, Jennifer | MicroRNA Processing and Binding Site Polymorphisms Are Not Replicated in the Ovarian Cancer Association Consortium                                  | BIOMARKERS & PREVENTION                                                 | 2011 | 20  | 8  | 1793-1797 | Web of SCI | not provide sufficient data    |
| Melo, Sonia A.        | A precursor microRNA in a cancer cell nucleus Get me out of here! RNA diagnostics: real-time RT-PCR strategies and promising novel target RNAs      | CELL CYCLE                                                              | 2011 | 10  | 6  | 922-925   | Web of SCI | Review                         |
| Mayer, Guenter        | Genetic variations in microRNA-related genes are associated with survival and recurrence in patients with renal cell carcinoma                      | WILEY INTERDISCIPLINARY REVIEWS-RNA                                     | 2011 | 2   | 1  | 32-41     | Web of SCI | Review lack of healthy control |
| Lin, Jie              | Two variants of the human hepatocellular carcinoma-associated HCAP1 gene and their effect on the growth of the human liver cancer cell line Hep3B   | CARCINOGENESIS GENES CHROMOSOMES & CANCER                               | 2004 | 39  | 1  | 48-58     | Web of SCI | not case-control study         |
| Di, YJ                | HCC-associated protein HCAP1, a variant of GEMIN4, interacts with zinc-finger proteins                                                              | JOURNAL OF BIOCHEMISTRY INTERNATIONAL JOURNAL OF ENVIRONMENTAL RESEARCH | 2003 | 133 | 6  | 713-718   | Web of SCI | Other disease study            |
| Fang, Xue             | Polymorphisms in GEMIN4 and AGO1 Genes Are Associated with the Risk of Lung Cancer: A Case-Control Study in Chinese Female Non-Smokers              | OF ENVIRONMENTAL RESEARCH                                               | 2016 | 13  | 10 | 939       | Pubmed     | Duplication                    |
| Mullany, Lila E       | Impact of polymorphisms in microRNA biogenesis genes on colon cancer risk and microRNA expression levels: a population-based, case-control study    | BMC MEDICAL GENOMICS                                                    | 2016 | 9   |    | 21        | Pubmed     | Duplication                    |
| zhu, Wenbo            | Genetic variants in the MicroRNA biosynthetic pathway Gemin3 and Gemin4 are associated with a risk of cancer: a meta-analysis                       | PEERJ                                                                   | 2016 | 4   |    | e1724     | Pubmed     | Duplication                    |
| Li, Rong              | MiRNA-Related Genetic Variations Associated with Radiotherapy-Induced Toxicities in Patients with Locally Advanced Non-Small Cell Lung Cancer       | PLOS ONE                                                                | 2016 | 11  | 3  | e0150467  | Pubmed     | Duplication                    |
| Gao, Yuhuan           | Single nucleotide polymorphisms of microRNA processing genes and outcome of non-Hodgkin's lymphoma                                                  | ONCOTARGETS AND THERAPY                                                 | 2015 | 8   |    | 1735-1741 | Pubmed     | Duplication                    |
| Zhao, Yufei           | Single-nucleotide polymorphisms of microRNA processing machinery genes and risk of colorectal cancer                                                | ONCOTARGETS AND THERAPY                                                 | 2015 | 8   |    | 421-425   | Pubmed     | Duplication                    |
| Qu, Yanhong           | MicroRNAs related polymorphisms and genetic susceptibility to esophageal squamous cell carcinoma                                                    | MOLECULAR GENETICS AND GENOMICS                                         | 2014 | 289 | 6  | 1123-1130 | Pubmed     | Duplication                    |
| Tian X                | Association of microRNA-related genes (DROSHA, DICER1 and GEMIN4) polymorphisms with T-cell lymphoma prognosis                                      | Zhonghua Xue Ye Xue Za Zhi                                              | 2014 | 35  | 5  | 408-413   | Pubmed     | lack of healthy control        |
| Yang, Pei-Wen         | Association of miRNA-related Genetic Polymorphisms and Prognosis in Patients with Esophageal Squamous Cell Carcinoma                                | ANNALS OF SURGICAL ONCOLOGY                                             | 2014 | 21  | 4  | S601-S609 | Pubmed     | Duplication                    |
| Weng, Yuxiong         | Common genetic variants in the microRNA biogenesis pathway are associated with malignant peripheral nerve sheath tumor risk in a Chinese population | CANCER EPIDEMIOLOGY                                                     | 2013 | 37  | 6  | 913-916   | Pubmed     | Duplication                    |
| Liu, Shuang           | Single Nucleotide Polymorphisms of MicroRNA Processing Machinery Genes and Outcome of Hepatocellular Carcinoma                                      | PLOS ONE                                                                | 2014 | 9   | 3  | e92791    | Pubmed     | Duplication                    |
| Jiang, Yue            | Evaluation of genetic variants in microRNA biosynthesis genes and risk of breast cancer in Chinese women                                            | INTERNATIONAL JOURNAL OF CANCER                                         | 2013 | 133 | 9  | 2216-2224 | Pubmed     | Duplication                    |
| Li YC                 | Correlation between tag single nucleotide polymorphisms of microRNA regulatory genes and the genetic susceptibility of primary liver cancer         | Zhonghua Yu Fang Yi Xue Za Zhi                                          | 2012 | 46  | 6  | 533-537   | Pubmed     | not provide sufficient data    |
| He, Yong              | Genetic Variations in MicroRNA Processing Genes Are Associated with Susceptibility in Depression                                                    | DNA AND CELL BIOLOGY                                                    | 2012 | 31  | 9  | 1499-1506 | Pubmed     | Duplication                    |
| Sung, Hyuna           | Common genetic polymorphisms of microRNA biogenesis pathway genes and breast cancer survival                                                        | BMC CANCER                                                              | 2012 | 12  |    | 195       | Pubmed     | Duplication                    |
| Liu, Jiaming          | with Risk of Prostate Cancer: A Case-control Study of the Chinese Han Population                                                                    | DNA AND CELL BIOLOGY                                                    | 2012 | 31  | 7  | 1296-1302 | Pubmed     | Duplication                    |

|                 |                                                                                                                                                   |                                  |      |    |    |           |        |                        |
|-----------------|---------------------------------------------------------------------------------------------------------------------------------------------------|----------------------------------|------|----|----|-----------|--------|------------------------|
| Permuth-Wey J   | MicroRNA processing and binding site polymorphisms are not replicated in the Ovarian Cancer Association Consortium                                | Cancer Epidemiol Biomarkers Prev | 2011 | 20 | 8  | 1793-1797 | Pubmed | Duplication            |
| Liang, Dong     | Genetic Variants in MicroRNA Biosynthesis Pathways and Binding Sites Modify Ovarian Cancer Risk, Survival, and Treatment Response                 | CANCER RESEARCH                  | 2010 | 70 | 23 | 9765-9776 | Pubmed | Duplication            |
| Lin, Jie        | Genetic variations in microRNA-related genes are associated with survival and recurrence in patients with renal cell carcinoma                    | CARCINOGENESIS                   | 2010 | 31 | 10 | 1805-1812 | Pubmed | Duplication            |
| Kim, Jong-Sik   | Association of a Common AGO1 Variant With Lung Cancer Risk: A Two-Stage Case-Control Study                                                        | MOLECULAR CARCINOGENESIS         | 2010 | 49 | 10 | 913-921   | Pubmed | Duplication            |
| Ye, Yuanqing    | Genetic Variations in MicroRNA-Related Genes Are Novel Susceptibility Loci for Esophageal Cancer Risk                                             | CANCER PREVENTION RESEARCH       | 2008 | 1  | 6  | 460-469   | Pubmed | Duplication            |
| Horikawa, Ybhei | Single Nucleotide Polymorphisms of microRNA Machinery Genes Modify the Risk of Renal Cell Carcinoma                                               | CLINICAL CANCER RESEARCH         | 2008 | 14 | 23 | 7956-7962 | Pubmed | Duplication            |
| Yang, Hushan    | Evaluation of genetic variants in microRNA-related genes and risk of bladder cancer                                                               | CANCER RESEARCH                  | 2008 | 68 | 7  | 2530-2537 | Pubmed | Duplication            |
| Wan, DF         | Two variants of the human hepatocellular carcinoma-associated HCAP1 gene and their effect on the growth of the human liver cancer cell line Hep3B | GENES CHROMOSOMES & CANCER       | 2004 | 39 | 1  | 48-58     | Pubmed | Duplication            |
| Wang JR         | Effects of two haplotypes of HCAP1 gene on cellular gene expression levels in a human hepatocarcinoma cell line Hep3B                             | Ai Zheng                         | 2002 | 21 | 11 | 1173-1181 | Pubmed | not case-control study |

Association of *GEMIN4* gene polymorphism and the risk of cancer: a meta-analysis

TableS2.Main results of the meta-analysis of the pooled OR.

| Variable                           | ORb (95% CI) P value |                      |                      |                      |                      |
|------------------------------------|----------------------|----------------------|----------------------|----------------------|----------------------|
|                                    | 1 vs.2               | 11 vs.22             | 12 vs.22             | (11 or 12) vs.22     | 11 vs.(12 or 22)     |
| rs2740348<br>allele 1=G/allele 2=C | NA                   | NA                   | NA                   | NA                   | 1.16(1.05-1.29)0.004 |
| Caucasian                          | NA                   | NA                   | NA                   | NA                   | 1.20(0.95-1.52)0.127 |
| Asian                              | NA                   | NA                   | NA                   | NA                   | 1.07(0.90-1.27)0.423 |
| Mixed                              | NA                   | NA                   | NA                   | NA                   | 1.23(1.05-1.43)0.009 |
| rs7813<br>allele 1=T/allele 2=C    | NA                   | NA                   | NA                   | NA                   | 1.12(1.03-1.22)0.009 |
| Caucasian                          | NA                   | NA                   | NA                   | NA                   | 1.09(0.95-1.25)0.206 |
| Asian                              | NA                   | NA                   | NA                   | NA                   | 1.14(1.02-1.27)0.019 |
| rs3744741<br>allele 1=C/allele 2=T | 1.03(0.94-1.14)0.510 | 1.02(0.79-1.31)0.904 | 1.02(0.79-1.33)0.855 | 1.04(0.81-1.34)0.760 | 1.04(0.92-1.18)0.509 |
| Asian                              | 1.01(0.91-1.12)0.896 | 1.01(0.78-1.32)0.920 | 1.01(0.77-1.32)0.941 | 1.02(0.79-1.31)0.907 | 1.01(0.88-1.15)0.918 |

NA: Not available
